# Supplementary material for: Potential of carbon uptake and local aerosol production in boreal and hemi-boreal ecosystems across Finland and in Estonia
Source: Copernicus journal article supplement (doi:10.5194/egusphere-2024-1967), 2024-07-26
Supplement: Supplementary file 1 [file egusphere-2024-1967-supplement.pdf]

# Potential of carbon uptake and local aerosol production in boreal and hemi-boreal ecosystems across Finland and in Estonia

5 Piaopiao Ke<sup>1</sup>, Anna Lintunen<sup>1,2</sup>, Pasi Kolari<sup>1</sup>, Annalea Lohila<sup>1,3</sup>, Santeri Tuovinen<sup>1</sup>, Janne Lampilahti<sup>1</sup>, Roseline Thakur<sup>1</sup>, Maija Peltola<sup>1</sup>, Otso Peräkylä<sup>1</sup>, Tuomo Nieminen<sup>1</sup>, Ekaterina Ezhova<sup>1</sup>, Mari Pihlatie<sup>4,5</sup>, Asta Laasonen, Markku Koskinen<sup>4,5</sup>, Helena Rautakoski<sup>3</sup>, Laura Heimsch<sup>3</sup>, Tom Kokkonen<sup>1</sup>, Aki Vähä<sup>1</sup>, Ivan Mammarella<sup>1</sup>, Steffen Noe<sup>6</sup>, Jaana Bäck<sup>2</sup>, Veli-Matti Kerminen<sup>1</sup>, Markku Kulmala<sup>1</sup>

<sup>1</sup> Institute for Atmospheric and Earth System Research (INAR) / Physics, Faculty of Science, University of Helsinki, Helsinki, 00014, Finland

10 <sup>2</sup> Institute for Atmospheric and Earth System Research (INAR) / Forest Sciences, Faculty of Agriculture and Forestry, University of Helsinki, Helsinki, 00014, Finland

<sup>3</sup> Finnish Meteorological Institute, Finland

<sup>4</sup> Department of Agricultural Sciences, Faculty of Agriculture and Forestry, University of Helsinki, Helsinki 00790, Finland

15 <sup>5</sup> Department of Agricultural Sciences, Faculty of Agriculture and Forestry, University of Helsinki, Helsinki 00790, Finland

<sup>6</sup> Institute of Forestry and Engineering, Estonian University of Life Sciences, 51006 Tartu, Estonia

20 Table S1. Analyzer and meteorological sensors for air temperature, humidity, PAR, global radiation

| Parameter                                       | Forest                            |                                                                                |                                     | Agricultural fields               |                                   |                                   | Peatland                          | Urban graden                      | Coastal area                      |                                    |
|-------------------------------------------------|-----------------------------------|--------------------------------------------------------------------------------|-------------------------------------|-----------------------------------|-----------------------------------|-----------------------------------|-----------------------------------|-----------------------------------|-----------------------------------|------------------------------------|
|                                                 | Värriö                            | Hyytiälä                                                                       | Ränskälänkorpi                      | Järvelja                          | Haltiala                          | Qvidja                            | Viikki                            | Siikaneva                         | Kumpula                           | Tvärminne                          |
| CO <sub>2</sub> /H <sub>2</sub> O fast analyzer | LI-7200, LI-COR Biosciences, USA  | LI-6262 (before 2018.03) and LI-7200 (after 2018.03), LI-COR, Biosciences, USA | LI-7200, LI-COR Biosciences, USA    | LI-7200, LI-COR Biosciences, USA  | LI-7200, LI-COR Biosciences, USA  | LI-7200, LI-COR Biosciences, USA  | LI-7200, LI-COR Biosciences, USA  | LI-7200, LI-COR Biosciences, USA  | LI-7200, LI-COR Biosciences, USA  | LI-7200RS, LI-COR Biosciences, USA |
| 3-D sonic anemometer                            | METEK uSonic-1, Elmshorn, Germany | Gill HS-50 anemometer, Gill Instruments, UK                                    | METEK uSonic-3, Elmshorn, Germany   | METEK uSonic-3, Elmshorn, Germany | METEK uSonic-3, Elmshorn, Germany | METEK uSonic-3, Elmshorn, Germany | Metek uSonic-3, Elmshorn, Germany | METEK uSonic-1, Elmshorn, Germany | METEK uSonic-1, Elmshorn, Germany | METEK uSonic-3, Elmshorn, Germany  |
| Air Temperature (°C)                            | PT-100                            | PT-100                                                                         | Hmp155                              | PT-100                            | HC2, Rotronic, Switzerland        | HMP155, Vaisala, Finland          | HMP110, Vaisala                   | HC2, Rotronic, Switzerland        | PT-100                            | HMP155, Vaisala, Finland           |
| Relative humidity                               | MP106A, Rotronic, Switzerland     | MP102H Rotronic, Switzerland (after 2012.06)                                   | HMP155, Vaisala, Finland            | WXT520, Vaisala, Finland          | HC2, Rotronic, Switzerland        | HMP155, Vaisala, Finland          | HMP110, Vaisala                   | HC2, Rotronic, Switzerland        | HMP243, Vaisala, Finland          | HMP155, Vaisala, Finland           |
| PAR (mmol/m <sup>2</sup> /s)                    | LI-190SB, LI-COR                  | LI-190SZ quantum sensor,                                                       | PQS, Kipp & Zonen B.V., Netherlands | Delta-T Pyranometer (only for     | Li-190R, LI-COR                   | PQS, Kipp & Zonen                 | Kipp& Zonen PQS 1,                | Li-190R, LI-COR                   | PARlite, Kipp &                   | ----                               |

|                    |                 |                                         |      |                   |                  |                   |                   |                  |                         |       |
|--------------------|-----------------|-----------------------------------------|------|-------------------|------------------|-------------------|-------------------|------------------|-------------------------|-------|
|                    | Bioscience, USA | LI-COR Biosciences, UK                  |      | global radiation) | Biosciences, USA | B.V., Netherlands | B.V., Netherlands | Biosciences, USA | Zonen B.V., Netherlands |       |
| Measurement height | 15 m            | 23.3 m before 3/2018, 27 m after 3/2018 | 29 m | 30 m              | 3.0 m            | 2.3 m             | 2.5m              | 3.0 m            | 29 m                    | 4.2 m |

22 Table S2. Comparison of across the hemi-boreal and boreal ecosystems in midday (10:00-14:00) of spring and summer.

| Ecosystem                  | Site           | Spring $\Delta N_{\text{neg}}$<br>( $1/\text{cm}^3$ , 50%) | Comparing with<br>Hyttiälä median<br>$\Delta N_{\text{neg}}$ | Comparing with<br>Hyttiälä 75 <sup>th</sup><br>percentile $\Delta N_{\text{neg}}$ | Summer $\Delta N_{\text{neg}}$<br>( $1/\text{cm}^3$ , 50%) | Comparing with<br>Hyttiälä median<br>$\Delta N_{\text{neg}}$ | Comparing with<br>Hyttiälä 75 <sup>th</sup><br>percentile $\Delta N_{\text{neg}}$ |
|----------------------------|----------------|------------------------------------------------------------|--------------------------------------------------------------|-----------------------------------------------------------------------------------|------------------------------------------------------------|--------------------------------------------------------------|-----------------------------------------------------------------------------------|
| Forest                     | Hyttiälä       | 2.03                                                       | 1                                                            | 1                                                                                 | 1.45                                                       | 1                                                            | 1                                                                                 |
|                            | Värriö         | 0.84                                                       | 0.41                                                         | 0.43                                                                              | 0.98                                                       | 0.68                                                         | 0.98                                                                              |
|                            | Järvelselja    | 0.73                                                       | 0.36                                                         | 0.28                                                                              | 0.66                                                       | 0.45                                                         | 0.55                                                                              |
| Drained peatland<br>forest | Ränskälänkorpi | 0.76                                                       | 0.37                                                         | 0.5                                                                               | 0.67                                                       | 0.46                                                         | 0.59                                                                              |
| Agricultural land          | Haltiala       | 7.66                                                       | 3.77                                                         | 2.22                                                                              | 1.88                                                       | 1.30                                                         | 1.29                                                                              |
|                            | Qvidja         | 2.36                                                       | 1.16                                                         | 1.17                                                                              | 1.70                                                       | 1.17                                                         | 1.34                                                                              |
|                            | Viikki         | 2.28                                                       | 1.12                                                         | 0.98                                                                              | 1.69                                                       | 1.17                                                         | 1.16                                                                              |
| Peatland                   | Siikaneva      | 1.09                                                       | 0.54                                                         | 0.51                                                                              | 1.51                                                       | 1.04                                                         | 1.02                                                                              |
| Urban vegetated<br>area    | Kumpula        | 4.86                                                       | 2.4                                                          | 2.41                                                                              | 5.03                                                       | 3.47                                                         | 3.78                                                                              |
| Coastal area               | Tvärminne      | -0.15                                                      | -0.07                                                        | 0.06                                                                              | 0.42                                                       | 0.29                                                         | 0.44                                                                              |

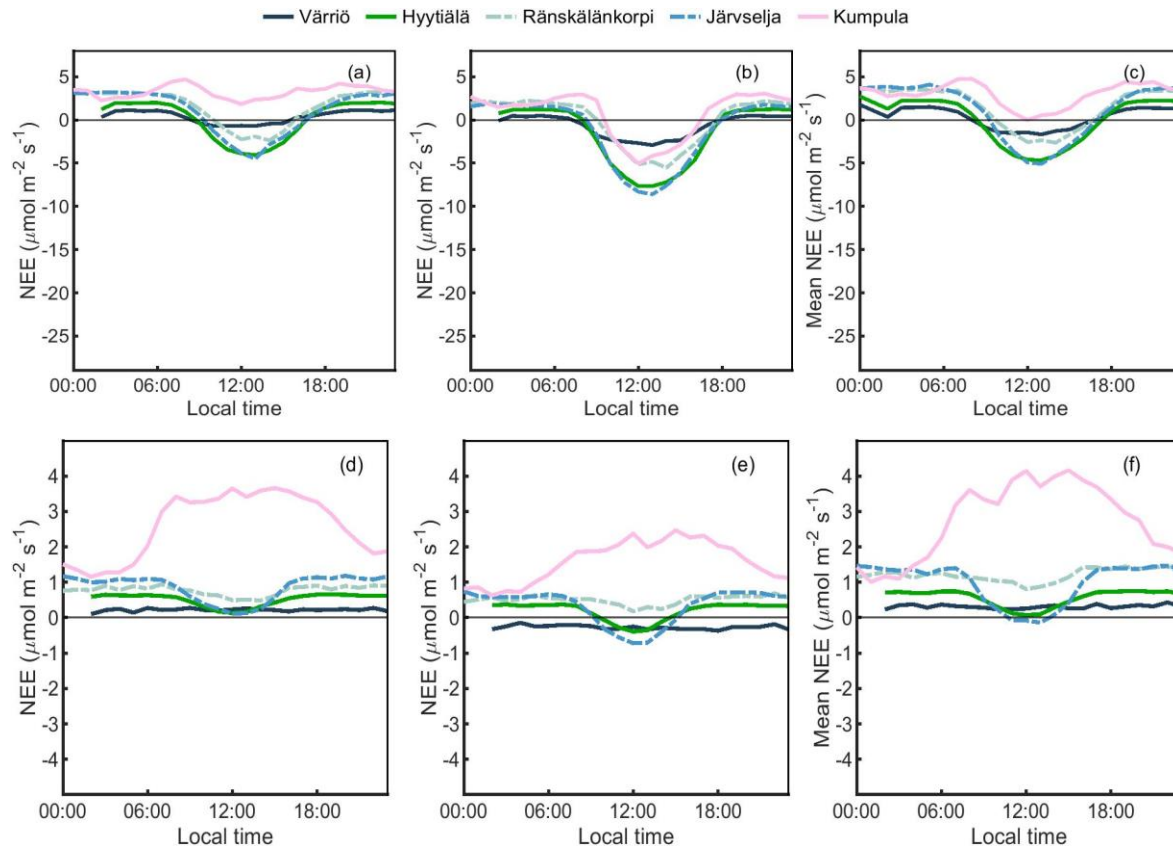

24

25

26 Figure S1. The 50<sup>th</sup> percentile (a), 25<sup>th</sup> percentile (b), and mean values (c) of NEE at each hour for  
 27 the forest sites and urban gardens in the autumn and the corresponding 50<sup>th</sup> percentile, 25<sup>th</sup>  
 28 percentile, and mean values in the winter, (d), (e), (f), respectively.

29

30

31

32

33

34

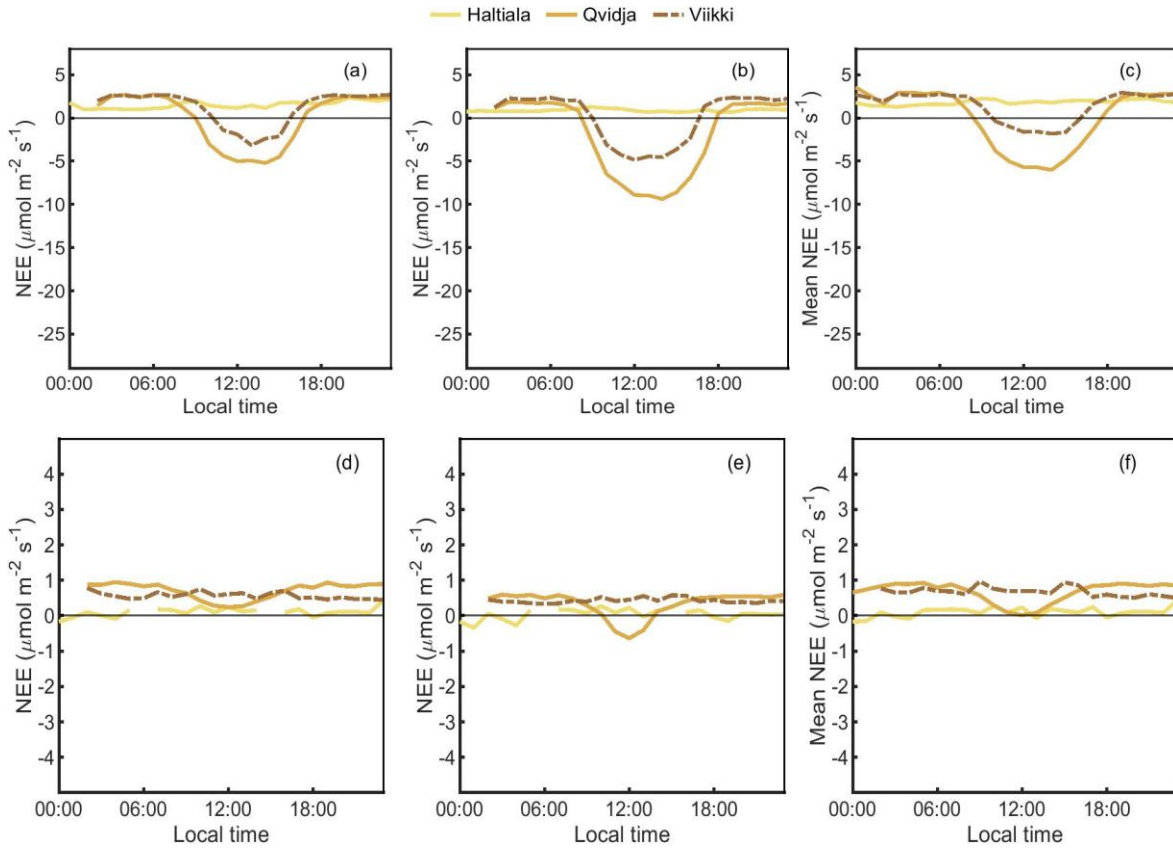

35

36

37 Figure S2. The 50<sup>th</sup> percentile (a), 25<sup>th</sup> percentile (b), and mean values (c) of NEE at each hour for  
 38 the agricultural lands in the autumn and the corresponding 50<sup>th</sup> percentile, 25<sup>th</sup> percentile, and  
 39 mean values, (d), (e), (f) in the winter, respectively.

40

41

42

43

44

45

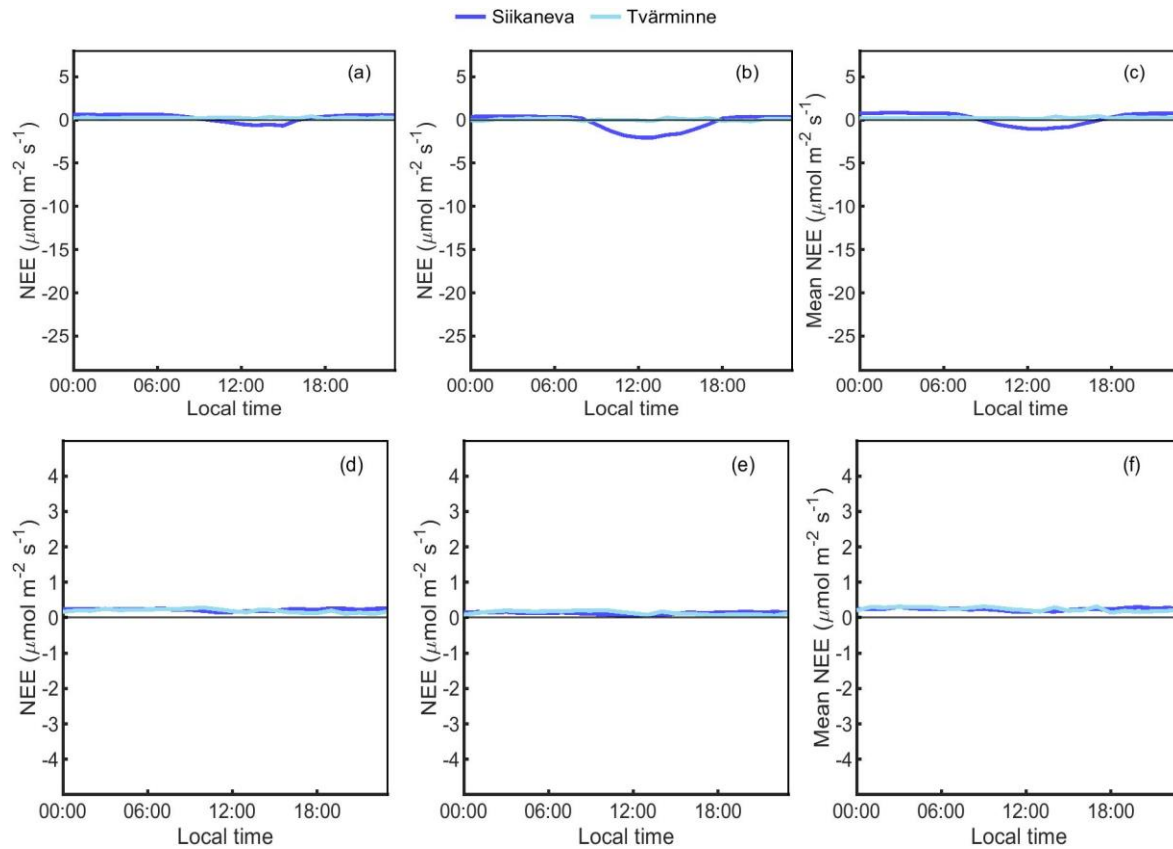

46

47

48 Figure S3. The 50<sup>th</sup> percentile (a), 25<sup>th</sup> percentile (b), and mean values (c) of NEE at each hour for  
 49 the open peatland and coastal area in the autumn and the corresponding 50<sup>th</sup> percentile, 25<sup>th</sup>  
 50 percentile, and mean values, (d), (e), (f) in the winter, respectively.

51

52

53

54

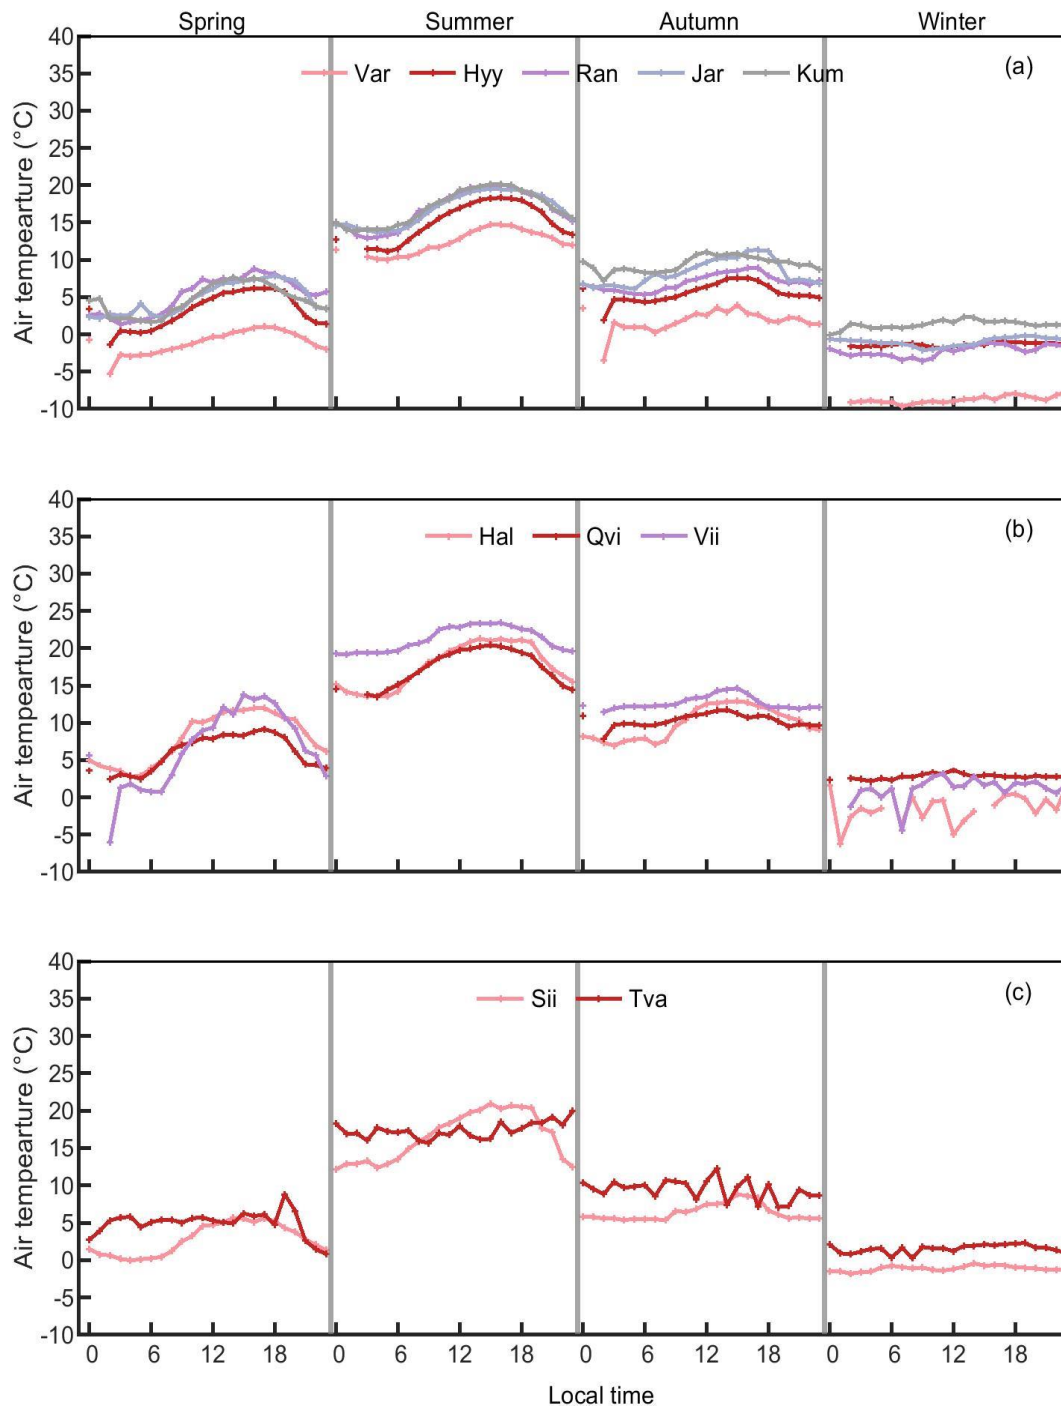

55

56 Figure S4. The median diurnal variation of the air temperature in the forests (a), agricultural fields  
 57 (b), and peatland and coastal area (c) in each season.

58

59



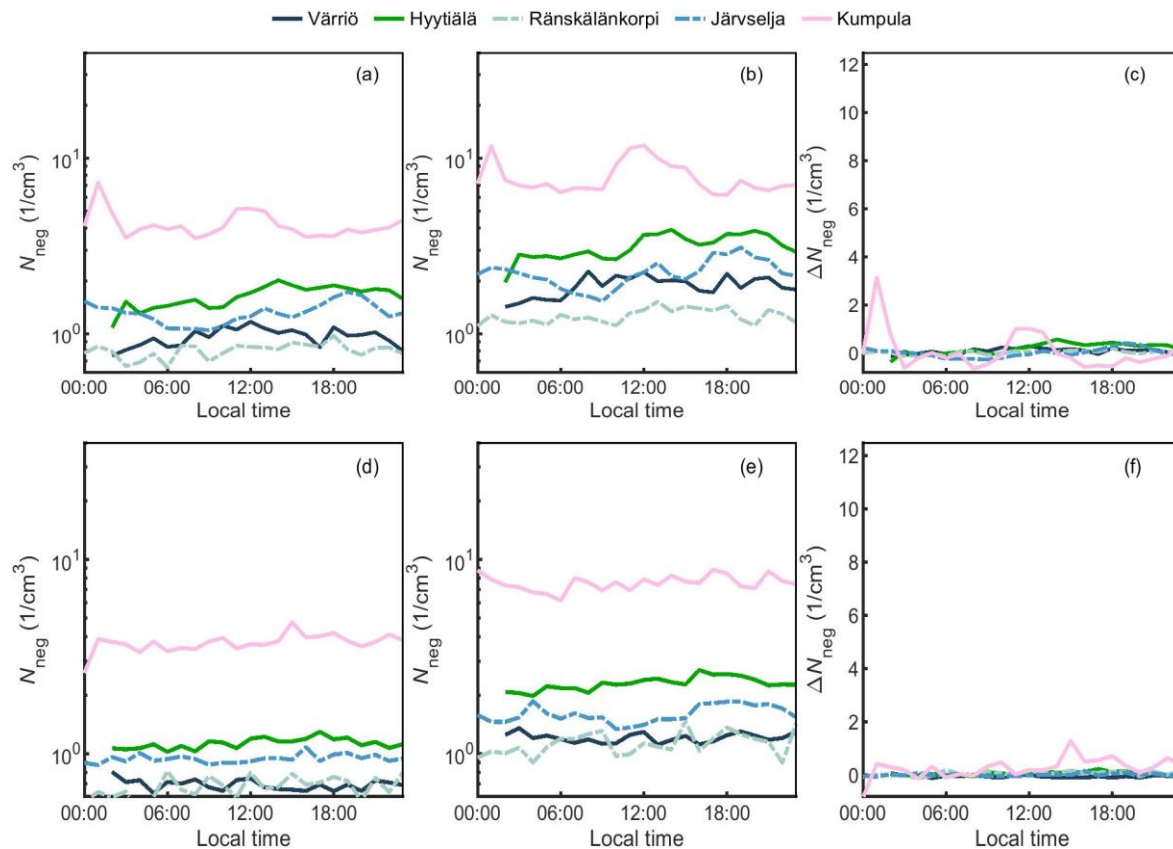

60

61

62 Figure S5. The 50<sup>th</sup> percentile (a), 75<sup>th</sup> percentile (b), and median daily fluctuations (c) of negative  
 63 ions at each hour for the forest sites and urban gardens in the autumn and the corresponding 50<sup>th</sup>  
 64 percentile, 75<sup>th</sup> percentile, and median daily fluctuations in the winter, (d), (e), (f), respectively.

65

66

67

68

69

70

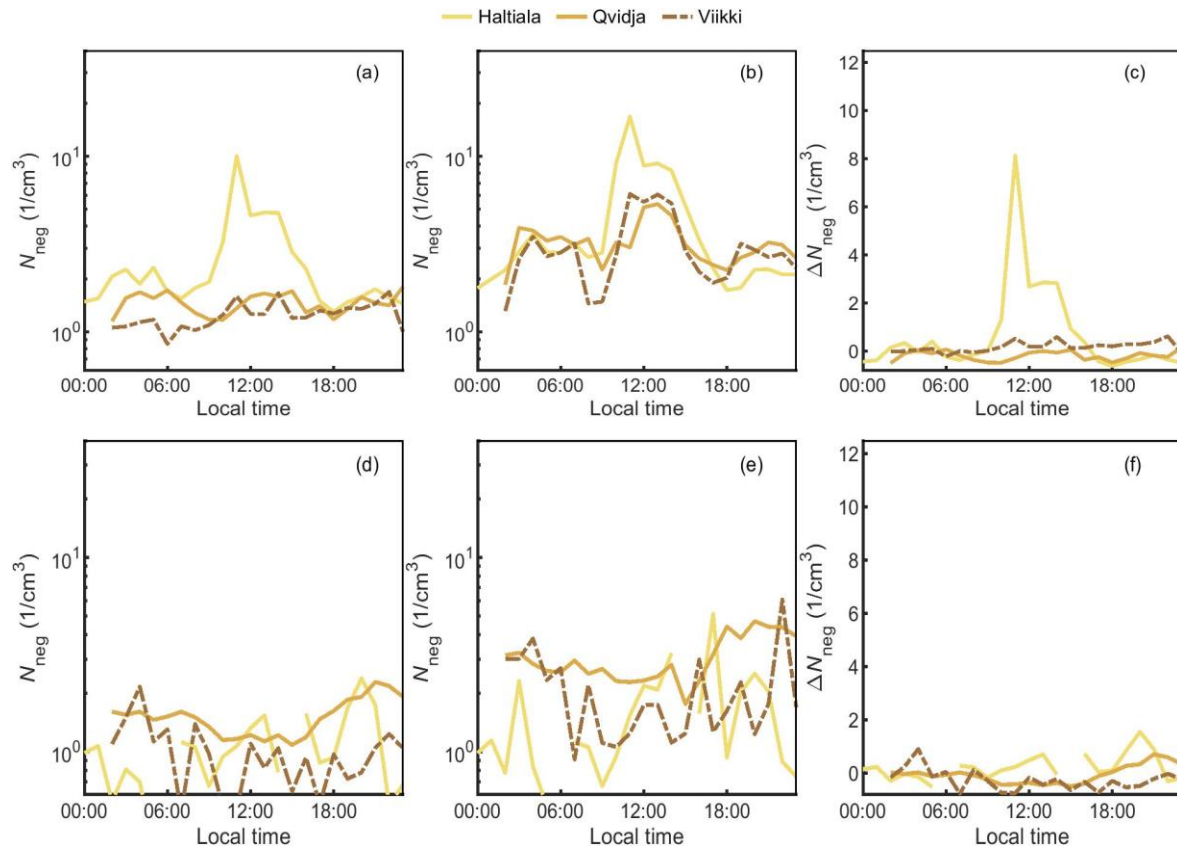

71

72

73 Figure S6. The 50<sup>th</sup> percentile (a), 75<sup>th</sup> percentile (b), and median daily fluctuations (c) of negative  
 74 ions at each hour for agricultural fields in the autumn and the corresponding 50<sup>th</sup> percentile, 75<sup>th</sup>  
 75 percentile, and median daily fluctuations in the winter, (d), (e), (f), respectively.

76

77

78

79

80

81

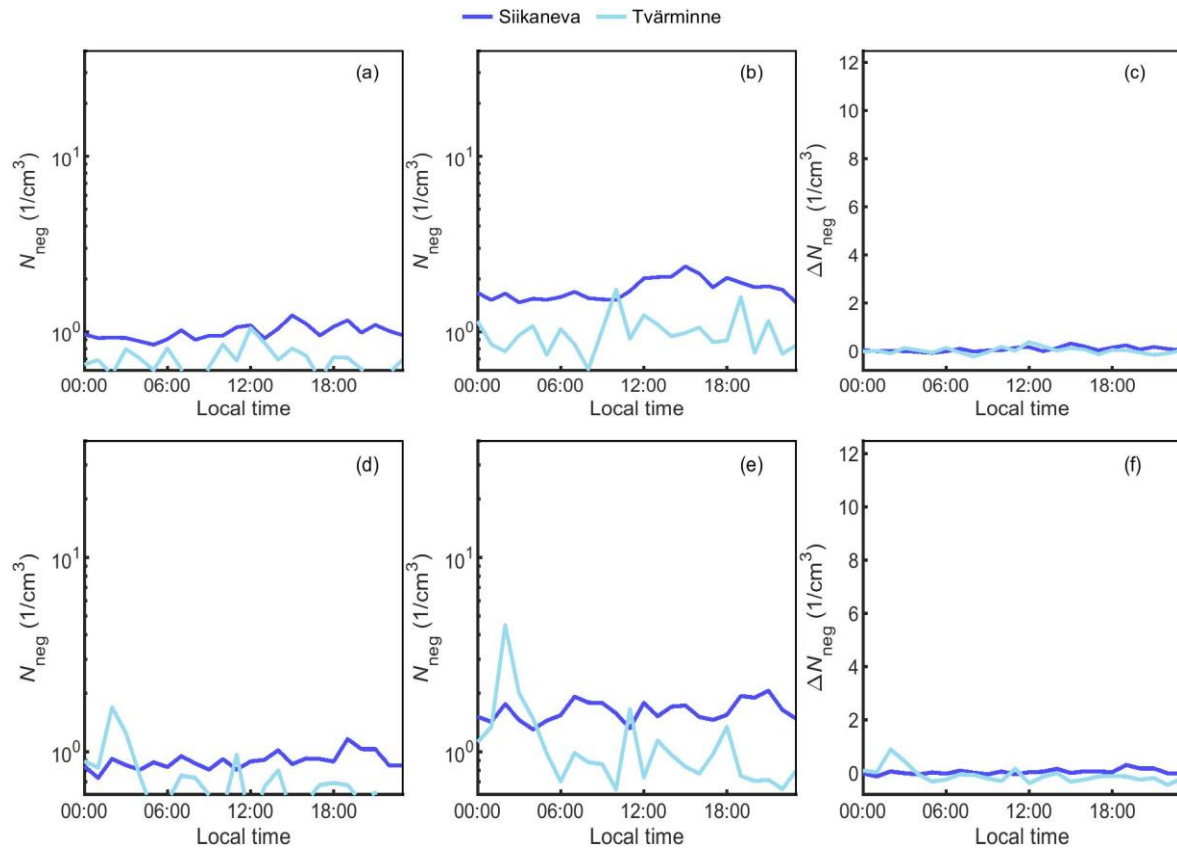

82

83

84 Figure S7. The 50<sup>th</sup> percentile (a), 75<sup>th</sup> percentile (b), and median daily fluctuations (c) of negative  
 85 ions at each hour for open peatland and coastal area in the autumn and the corresponding 50<sup>th</sup>  
 86 percentile, 75<sup>th</sup> percentile, and median daily fluctuations in the winter, (d), (e), (f), respectively.

87

88
